# Supplementary material for: Yorkie controls tube length and apical barrier integrity during airway development
Source: PubMed Central journal article supplement — J Cell Biol. 2019 Jul 17;218(8):2762–81. doi: 10.1083/jcb.201809121 (PMC6683733; doi:10.1083/jcb.201809121), 2019-07-17
Supplement: JCB_201809121_DataS1.pdf [file JCB_201809121_DataS1.pdf]

## Complete donor vector sequence used for generation of the mKate2-*yki* knock-in allele

CCAGCCCGCTAATGAGCGGGCTTTTTTTGAACAAAACACTTATATCGTATGGGGTACTTCAGGTGTACATTTGAAGAGATAAATGACTGAAATCTAGAA  
ATATTTTATCTGATTAATAAGATGATCTTCTGAGATCGTTTTGGTCTGCGCTAATCTCTGCTCTGAAAACGAAAAACCGCTTGCAGGGCGTTTTTCGAAGGTT  
CTCTGAGCTACCAACTCTTTGAACCGAGGTAAGTGGCTTGGAGGAGCGCAGTCAACAAAACCTGTCTTTCAGTTTACGCTTAAACGGCGCATGACTTCAAGACTAAC  
TCCTCTAAATCAATACCAAGTGGCTGCTGCCAGTGGTCTTTTGATGTCTTTCCGGGTTGGACTCAAGACGATAGTTACCGGATAAGGCGCAGCGGTGGACTGAA  
CGGGGGGTCGTGCATACAGTCCAGCTGGAGCGAACTGCCACCCGAACTGAGTGTAGGCGTGAATGAGACAAACCGGCCATAACAGCGGAATGACACCG  
GTAACCCGAAAGGAGGATAAATGATGAGTGCAGTAAACGAGGAGGCGCAGGAGGGAACCGCTGGTATCTTTATAGTCTGTCGGGTTTTCCGCCACTGATTTGACGCT  
CAGATTCGTGATGCTTGTAGGGGGCGGAGCCTATGAAAAACGGCTTTGCCGCGCCCTCACTTCCCTGTTAAGTATCTTCTGGCATCTCCAGAAATCTC  
CGCCCCGTTGTAAGCCATTTCCGCTCGCCGAGTGAACGACCGAGCGTAGCGAGTCAAGTGAAGCGGAAGCGGAATATATCTGTATCACATATCTGTGACGCG  
ACCGGTGACGCTTTTTCTCTGCCACATGAAGCACTTCACTGACACCTTCACTAGTGAACATAGTAAGCCAGTATACACTCCGCTAGCGCGAGGAGCGCAGTCA  
CCTCTAGATGTGACGGAGATCACTTCGACATAAATAAATAATCTGGTCCGTGTTGATACCGGTAACCACTGGTGAAGCCCTGGGCAACTTTTGGCGAAACCAATGATCTCG  
GCACGTAAGAGTTCCAACCTTACCATAATGAAATAAGATCACTACCGGGCGTATTTTTGAGTTATCGAGATTTTCAGGAGCTAAGGAAGCTAAAATGGAGAAAA  
AAATCACTGGATATACCACCGTTGATATATCCCAATGGCATGTAAGAACATTTTGGAGCATTTTCAGTCAAGTGTCTCAATGTACTATAACCAGACCGTTTCAGCTGG  
ATATTACGGCTTTTTAAAGACCGTAAAGAAAAAAGCACAAGTTTTTCCGGCCTTATTCACATTTTCCCGCCTGATGAATGCTCATCCGAATTCGGTATGGC  
AATGAAAGACGGTGGTGGTATGAGTGTCCACCTTGTACACCGTTTCCATGAGCAAACTGAAACGTTTTTCATCGCTAGAGTGAATACCAAGCTTCCGATG  
ATTTCCGGCAGTTTACACATATATTCGCAAGATGTGGCGTGTACCGTGAACAACTGGCCTATTTCCCTAAAGGGTTTTATTGAGAATATGTTTTCTGTACGCCAA  
TCCTGGGTGAGTTTTCCAGTTTTGATTTAAACGTGGCAATATGGAACAATCTTCCGCCCGCTTTTCCATGGGCAAAATATTATACGCAAGGCGACAAGGTGT  
GATGCCGCTGGGATTACAGTTCATCATGCCGTGTGTATGGCTTCCATGTGCGGAGAATGCTTAATGAATTACAACAGTACTGCGATGAGTGGCAGGGCGGGGGC  
TAACCGAATCGTACCACTTCGACACATAAACCGAGGTCAGTGTCCCTGTTACACCGTTTCCATGAGCAAACTGAAACGTTTTTCCATGAGCAAACTGAAACGTTTT  
ATATCTTAGGAGGAGTTCACGTACGCTTTTCGACGCGGATGATTTGTTTATGGCGGAAATAATATGAGAAATGAGAGGAAGCCCCGATGGGGATCCAGAA  
TATGTCACACAGCACGGCGATATTTACATTTGTGTATGCGACATAGTTATTGTTAAGCGAAAAATGCCTCCGAATTGTGTCGTGCCAATATATCAATGTTAAAA  
TACTTTTTGCTGTAGCCGAACTAGCGATGGACCTTGAAGTGTGTAACAACTGTCTGTCGCTCACAGACCTGGCCCGCTCATCTACGGGGAACAAACGAAAA  
GGGAGACATTCAGCGGAGGAGCGGAGCGGCTTCTTCCACTGCAATGCTTTTTGAAAGGGTTGAATGAACGTGAAACGTTTTTCCGCTGAAACGTTTTTCCGATG  
CATTCAAGTATATTGTTATTTGGTATGTTTGTGACAGACCTTTACCTGCACTTATTACTAATTAACAAGGACACATTTACAATCAAGTTTATTTGTTTGGTGT  
GTTTTGACAGACCTTTCCTGTACTTATTTCACTAAACAAATGTTATAAACCAATAAATAAATTTAGTCTAATAATTTATAGTCTGATATTATGGAACACAAG  
TGTGTGGGCTATACACACACATAATTAATACTACTTTGTTTTGTCCCTATTAATTAACAATAATAGATAAACTTTAGCTATAGCTAAAGGAATCGACAAAAAG  
TCGTAATCGGCTTCGGAATACCCCTGGCATTCCGAGGTGACGCCAGGCGGATTAACGAGGACGCTAGTATCGGAATGGACAAGTGGACGGGGGATAGCC  
ATCTGGCAACACTTCAATTAACAACAAGCAAGTGAACACGCTCGCTAAGCGAAAGTAAAGCAAAATTAAGTATTTTATTGCAACGAAGTTTTGTTGCAACGCTT  
ATTGTGACGTACGTTAAAGATAATCATGCGTAAAATGACGCATGTGTTTTATCGGCTGTATATCGAGGTTTTATTAATTTGAATAGATAATTAAGTTTTATTAT  
TTACACTTACATACTAATAATAAATTAACAACAATAATTTATTTATGTTTATTTATTTATTAATAAAAAAACAAAACTCAAAATTTCTTATATAAGTAACAAAACCTTTAG  
GATCTAATCAATTAGAGACTAATTAATTAGAGTCAATTAATTAGTCAAGCTTATCGATTTTGAACCTCGACCGCGGAGTATAAATAGAGCGCTTCGCTCT  
ACGGAGCGACAAATTAATTAACAACAAGCAAGTGAACACGCTCGCTAAGCGAAAGTAAAGCAAAATTAAGTATTTTATTGCAACGAAGTTTTGTTGCAACGCTT  
GGTCCGCCCATGGCTCTCCGAGGACGTCAAGGAGTTCATGCGCTTCAAGGTGCGCATGGAGGGCTCCGTGAACGGCCACGAGTTGAGATCGAGGGCGA  
GGGCGAGGGCCGCCCTACGAGGGCACCGCAAGCTGAAGGTGACCAAGGGCGGCCCTGCCTTCGCTGGGACATCCTGCCCCAGTTCCAGTAC  
GGCTCAAGGTGACGTGAGCAAGCAGCCCGGACATCCCGACTCAAGAAGCTGCTTCCCGGAGGGCTCAAGTGGGAGCGGCTGATGAACCTTCGAGGACGGCG  
CGGTGACCGTACCGTACCGAGGACTCTCCCTCCAGGACGGCTCCTAAGTCAAGGGTCAAGGTTTCATCGCGTGAACCTTCCCTGAGGCTTCCCTGAGGCTCGAAG  
AAGACTATGGGCTGGGAGGCGTCCACCGAGCGCTGTACCCCGCGAGCGGCTGTGAAGGGCGAGATCCACAAGGCCCTGAAGCTGAAGGACGGCGGCCACTAC  
CTGGTGGAGTTCAAGTCCATCTACATGGCCAAAGACCGGTCAGCTGCCCGGCTACTACTAGCTGGACTCAAAGCTGGACATCACCTCCACACAGGACTACAC  
CTCTGTGGAGCAGTACGAGCGCGGAGGGCCGCCACCACTGTTCTGTAGCGCCGCGACTCTAGATCATAATCAGCCATACACATTTAGAGGTTTTACTTG  
CITTAATAAAACCTCCACGACTCCCTTGAACATAAATAAATGCAATTTGTTGTTAACTTTGTTTATTGCGACTTAAATGTTTACAAATAAGCAATAG  
CATCAAAAATTTCAAAAATAAGCATTTTTTCTACTGCATTCTAGTTGTGTTTTGTTCAAACTCATCAATGTATCTTATAGATCTATAACAAGAAAAATATATATAATA  
AGTTATCAGTAAGTGAACATGAAATAACAATAATAATTCGTATGAGTTAAATCTTAAAGTCAAGTAAAGATAATCATGCGCTATTTGACTCACGGGCGCTT  
ATAGTTCAAAATCAGTGACACTTACCGCATTGACAAGCACGCTCACGGGAGCTCAAGCGGCGACTGAGATGCTCTAAATGCACAGCGACGGATTTCGCGCTATTTA  
GAAAGAGAGCAATATTTCAAGAAATGATGCGTCAATTTTACGCACTATCTTTAGGTTAAACCTTAATGTTATAGTTTCGCGAGCGCGATGGAGTGATAC  
GTATGTAAGAAACATATATGTGCGCGTGCCTAATCGCTAAGATAATTTCTATGTATGTTTGTATGTTTGTATACAATAAGTGCCTTTATGTAAGGAGCTGATTAAG  
GAGAATGCACATGAAGCTGTACATGGAGGCGCCGTGAACAACCACTTCAAGTGCACATCCGAGGCGAAGGCAAGCCCTACGAGGGCACCCAGACCATG  
AGAATCAAGGCGGTGAGGGGGCCCTCCCTTCGCTTCGACATCTGGCTACAGCTTCAATGACGGCAGCAAAACCTTCAACACCAACCCAGGGCATCCCC  
GACTCTTTAAGCAGTCTTCCCGAGGGCTCACATGGGAGAGTACCACATCAAGAGCGGGGGCTGTGACCCTACCCAGGACACCCAGCTCCAGGACG  
GCTCTCATCTCAACAGTCAAGGAGGCTTCCCTCAACCTGAGTGTGCGGGTCAACCAAGGACAGCAACCTGCAAGGCGCTTCCAGGCGCTTCCAGAGCGTCTGT  
CCCCGTGACGGCGCTGGAAGGCGAGCGGACATGCCCTGAAGCTGTGGGCGGGGCCCTGATCTGCAACTTGAAGACCACATACAGATCCAAGAAACC  
CGCTAAGAACCTCAAGATGCCCGGCTACTATGTGACAGAAAGACTGAAAGAAATCAAGGAGCGCCGACAAAGAGACTACGTCGAGCAGCAGAGGTGGCTGT  
GGCCAGTACTGCGACCTCCCTAGCAAACTGGGCGACAGAGGTGGAGGAGGTATGTTAACGACGATGTGACGCCAGCAGCAATAACAACAGCTGATCGAGAAGGA  
GATCGACGACGAGGACATGCTTTCGCGGATCAAGTCCAACAACCTGGTGTGCGGGTCAACCAAGGACAGGACGAGCAACCTGCAAGGCGCTTCCAGAGCGTCTGT  
AATCCGGGTGACGCCAAGCGCCGCTGACGCTGCCCTGCGCATCGGAAGCTGCCAACTGTTTTTTACCCCGCCCGCCCGTGCAGCTCGCGGGCCAAACAGCGC  
CGACTCCACTACGACGCGGCTCCAGTGCAGCATCAACATCGGGAACAAGCGCTCCATCGTCCAGCAGCCAGATGGCCAGTCGCCATCGCCGCTATCCCCAGC  
TCCAGATTACGCGTCTCCAGCACAGCGCCTGGCGATACATCACTCCGAGCCCGCAGCAGCCCGCTCGTGCAGCAGAACTAATGTGCGCGCCCGGAGC  
GACGACGACGAGCAAACTCGAAGTCCCAATCCGAGCAGCAACAGCAGCCCTGCGGCACTTTCCAGAGAAACAGTGCCTCAAGGTTCCCGAGGCGTCCCGG  
CGGCCAGCTCGGCCATTGATCTGAGCAGCATGAACACCTGCATGTGCGAGGACATTTCCATGTCCATGCAGACAGTGCACAAGAAGCAGCGCTCTACGAGCTCATC  
AGCCCCATTGATGAAACCGCAACTAGGCGCTTCCCGCGGATGGGAGCAAGCCAAGCAATGATGGCCAGATCTACTACTGAAAGTGAAGTTGGGCGAGATT  
TTAAAAATGATATGATGAAGCTTTTAAATACGTGTCTTCTTATGAACCTATGAAAACATAAATAATCTTGTGAGTACAGAAATCTCATTGGCTTCTGTGGATGTC  
TTTTCAAGTTTTACTCTTAATCACTACTAGTCAACTAATACCAAAACAGCAATCTCAACAATGGTGTCTCTCTACTTGCAGTACATACTACAAAATCTACGAGTGGGA  
GGATCCAGAAATCAATATCGCCAGCAGCAAACTTGTATGGCCGAGGAAATAAGCAGAAATGGTAGGTTCTATCTTAGATGAATGCCTTAGATAAGCAAGTCG  
TTAAGTCTGTGGTCTGCTCATTGTTAACCACTTAAATCAGCCATCAGAGGACTAATTAATGCTAGAGACCAGGCGAGGATAAGATAGGCTTAACTATTCCA  
ACTAACCGAACCGGTGCTAGCGCTTTGTTATTTTTCTAAATACATTTCAAATATGATCCGCTCATGAGACAATAACCCTGATAAATGCTTCAAATAATTTGAAAAAGG  
AAGAGTATGAGTAACTCAACTTTTTCCGCTGCCCTTATCCCTTTTTGCGGCAATTTGCCCTTGTGCTACCCGAAACCGCTGTTGAAAGTAAATGAGACTGCTG  
AAGATCAGTTGGGTGACAGGTGGTTACATCGAAGTGGATCTCAACAGCGGTAAGTCTTGTAGAGTTTTGCGCCGAAAGAACCTTTCAATGATGAGACTTTTT  
AAAGTTCTGCTATGTGGCGCGTATTATCCGTTGTGACGCGGGCAAGAGCAACTCGTGCAGCATACTACTTCTCAGAATGACTTGGTTGAGTACTCCAGCTC  
ACAGAAAAGCATCTACGGATGGCATGACAGTAAGAGAAATATGCAAGTGTGCCATAACCATGATGATAAACAAGTGCAGGCAACTTACTTGCACACGATCGGAG  
GACCGAAGGAGCTAACCGTTTTTGCACAACATGGGGATCATGTAACCTGCTGTGAGGAAACCGGAGCTGAATGAAGCCATAACAAACGACGAGCGTGA  
CACCGATGCGCTGACAGTCAACCGTTCGCGCAACGTTGCGCAACTTAACTGCGGAACTACTACTCTAGCTTCCCGGCAACAATAATGAGACTGAGTGGAGCGGATA  
AAGTTGACGAGCACTTCTGCGCTCGGCCCTCCGGCTGGCTGTTTTATTGCTGATAAATCTGGAGCGGTGAGCGTGGTCTCGGGTATCATTGCAGCACTGGG  
CCAGATGTAAGCCCTCCGATCTAGTTATCTACACGACGGGAGTCAGGCAACTATGGATGAACGAAATAGACAGATCGCTGAGATAGTTGCCTCACTGATTA  
AGCATTGGTAA
